# Supplementary material for: A comprehensive framework for stochastic calibration and sensitivity analysis of large-scale groundwater models
Source: Copernicus journal article supplement (doi:10.5194/hess-28-2661-2024), 2024-06-25
Supplement: Supplementary file 1 [file hess-28-2661-2024-supplement.pdf]

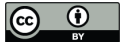

*Supplement of*

## **A comprehensive framework for stochastic calibration and sensitivity analysis of large-scale groundwater models**

**Andrea Manzoni et al.**

*Correspondence to:* Monica Riva ([monica.riva@polimi.it](mailto:monica.riva@polimi.it))

The copyright of individual parts of the supplement might differ from the article licence.

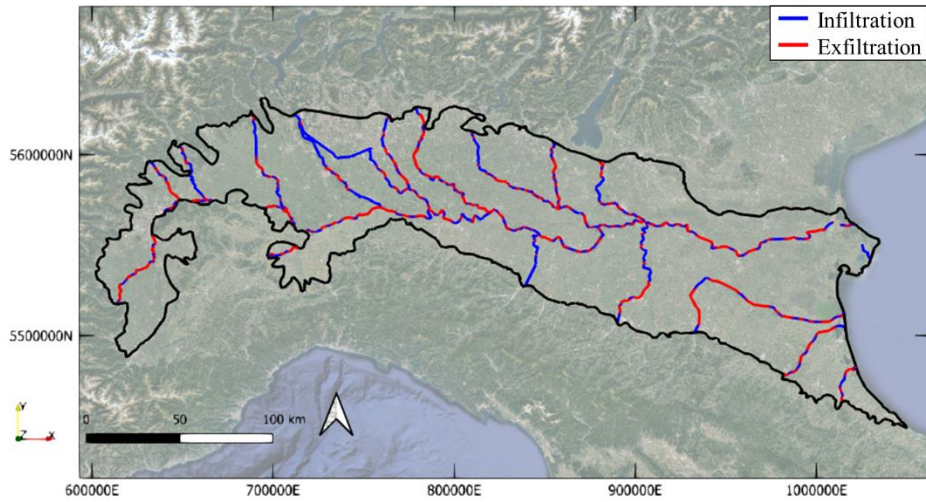

**Figure S1: Analysis of interactions between rivers and groundwater. Blue and red colors correspond to river segments that recharge and drain the aquifer, respectively. Background map: © Google Maps 2023.**
